# Supplementary material for: Investigating Vernal Pool Fairy Shrimp Exposure to Organophosphate Pesticides: Implications for Population-Level Risk Assessment
Source: MDPI journal article supplement (doi:10.3390/ecologies3030024), 2022-08-02
Supplement: s1 [file s1]

Archive with 5 entries (5 files):
- Supplemental Materials_Figure S1.pdf
- Supplemental Materials_Table S1.pdf
- Supplemental Materials_Table S2.pdf
- Supplemental Materials_Table S3.pdf
- Supplemental Materials_Table S4.pdf
