# Supplementary material for: Investigating Vernal Pool Fairy Shrimp Exposure to Organophosphate Pesticides: Implications for Population-Level Risk Assessment
Source: MDPI journal article supplement (doi:10.3390/ecologies3030024), 2022-08-02
Supplement: s1 [file s1 › Supplemental Materials_Table S2.pdf]

**Table S2. Supplementary Materials.** Population and spatial characteristics.

| Characteristic                   | General                                                                                                                | Realistic                                                                                                                                                                                                                                                         | Precise                                                                                                                                                | Taxonomic Specificity                                                                                                     | Reference     |
|----------------------------------|------------------------------------------------------------------------------------------------------------------------|-------------------------------------------------------------------------------------------------------------------------------------------------------------------------------------------------------------------------------------------------------------------|--------------------------------------------------------------------------------------------------------------------------------------------------------|---------------------------------------------------------------------------------------------------------------------------|---------------|
| Density dependence               | Logistic density dependence used to model Crustacean population growth.                                                | Impairment and population decline observed with increased density in Mysidopsis species. Higher densities of individuals per litre result in decreased fitness.                                                                                                   | Maximum population density of 200 individuals/liter water. Observation of 0.33 to 23.67 individuals/cubic meter.                                       | Mysid shrimp ( <i>Americamysis bahia</i> ), Mysidopsis species, <i>Branchinecta lynchi</i> , <i>Branchinecta lindahli</i> | [24,35,43-47] |
| Population size                  |                                                                                                                        |                                                                                                                                                                                                                                                                   | Physical characteristics (temperature and pool inundation) impacted both the distribution and number of vernal pool fairy shrimp sampled.              | <i>Branchinecta lynchi</i>                                                                                                | [34]          |
| Spatial metapopulation structure |                                                                                                                        | This species has a sporadic distribution within vernal pool complexes wherein the majority of pools in a given complex may not have the species observed in them. In a given location, a population may be comprised of a single inhabited pool within a complex. |                                                                                                                                                        | <i>Branchinecta lynchi</i>                                                                                                | [1,5]         |
| Movement                         |                                                                                                                        | Mammals, birds, fish, amphibians, crayfish, and insects provide a “directed” passive dispersal vector whereas wind provides a “random” passive dispersal vector.                                                                                                  |                                                                                                                                                        | <i>Branchinecta lynchi</i>                                                                                                | [31,32]       |
| Habitat features                 |                                                                                                                        | Observed Temperature Range of -7.8c to 32C for <i>Branchinecta lindahli</i>                                                                                                                                                                                       | Habitat duration of between 3 and 14 weeks.                                                                                                            | <i>Branchinecta lynchi</i> , <i>Branchinecta lindahli</i>                                                                 | [34,35]       |
| Geographical range               | Endemic to vernal pools in the Central Valley, coast ranges, and a limited number of sites in the Transverse Range and |                                                                                                                                                                                                                                                                   | Three vernal pool sites located in Merced County agricultural area of California’s Central Valley. Sites include Canal Creek Tributary Watershed site, | <i>Branchinecta lynchi</i>                                                                                                | [5,8]         |

|                                    |                                   |  |                                                                                                                                                                                                                                                                |                            |      |
|------------------------------------|-----------------------------------|--|----------------------------------------------------------------------------------------------------------------------------------------------------------------------------------------------------------------------------------------------------------------|----------------------------|------|
|                                    | Santa Rosa Plateau of California. |  | Owens Creek Tributary Watershed site, and Middle Mariposa Slough Tributary Watershed site.                                                                                                                                                                     |                            |      |
| Habitat classification/suitability |                                   |  | Mean pool area of pools containing <i>Branchinecta lynchi</i> was 147.1 meters squared.<br>Mean pool depth of pools containing <i>Branchinecta lynchi</i> was 0.14m.<br>Mean pool volume of pools containing <i>Branchinecta lynchi</i> was 20.3 meters cubed. | <i>Branchinecta lynchi</i> | [34] |

<sup>a</sup>. The density dependent factor used in Thursby (2016) and Thursby et al., (2018) is calculated based upon the formulation first described by Leslie, 1948 [24,43].

<sup>b</sup>. In Gallagher (1996), distribution and occurrence of *Branchinecta lynchi* in a large vernal-pool complex in Butte County, California, U.S.A., were sampled. The 105 ha vernal-pool complex was located northeast of the City of Chico, California (T 22 N, R 2 E, Sec 22), at an elevation of 60m [34].

<sup>c</sup>. In Rogers (2015), responses in *Branchinecta lindahli* cultures collected from four populations across 8° of latitude in Lassen County, Riverside County, San Luis Obispo County and Yolo County, California, USA were investigated [35].

<sup>d</sup>. In Sinnathamby et al. (2020), Figure 1., a map of the state of California illustrating the spatial location of each of three vernal pool sites, can be found [8].

<sup>e</sup>. A cell that is left blank reflects that no data was collected.
