# Supplementary material for: Investigating Vernal Pool Fairy Shrimp Exposure to Organophosphate Pesticides: Implications for Population-Level Risk Assessment
Source: MDPI journal article supplement (doi:10.3390/ecologies3030024), 2022-08-02
Supplement: s1 [file s1 › Supplemental Materials_Table S3.pdf]

**Table S3. Supplementary Materials.** External factors.

| Characteristic             | General                                                                                                                                                                        | Realistic                                                                                                                                                                                                                                                                                                                                                                                      | Precise                                                                                                                     | Taxonomic Specificity      | Reference   |
|----------------------------|--------------------------------------------------------------------------------------------------------------------------------------------------------------------------------|------------------------------------------------------------------------------------------------------------------------------------------------------------------------------------------------------------------------------------------------------------------------------------------------------------------------------------------------------------------------------------------------|-----------------------------------------------------------------------------------------------------------------------------|----------------------------|-------------|
| Predation                  |                                                                                                                                                                                | Aquatic predatory water birds, amphibians, and insects provide a "directed" passive dispersal vector (for eggs).<br>Fairy shrimp are fed upon by waterfowl and other vertebrates, such as western spadefoot toad ( <i>Scaphiopus hammondi</i> ).<br>Fairy shrimp feed on algae, bacteria, protozoa, rotifers, and bits of detritus.                                                            |                                                                                                                             | <i>Branchinecta lynchi</i> | [5,31,32]   |
| Competition                | Only rarely does the vernal pool fairy shrimp co-occur with other fairy shrimp species, but where it does, the vernal pool fairy shrimp is never the numerically dominant one. | Has been observed in pools with <i>Linderiella occidentalis</i> and <i>Lepidurus packardi</i> . These two species were observed to be more tolerant of high temperature and low oxygen than <i>Branchinecta lynchi</i> . Has also been observed alone.<br>Has rarely been observed in pools with <i>B. mackini</i> , <i>B. lindahli</i> , <i>B. longiantenna</i> , and <i>B. conservatio</i> . |                                                                                                                             | <i>Branchinecta lynchi</i> | [1,5,34,48] |
| Environmental conditions   |                                                                                                                                                                                | Duration of pool inundation (pool depth and duration) are important to the occurrence of <i>Branchinecta lynchi</i> .                                                                                                                                                                                                                                                                          | Observations of <i>Branchinecta lynchi</i> involved locations where the recorded temperature range was between -5C and 25C. | <i>Branchinecta lynchi</i> | [5,34]      |
| Stressors - pathogens      | N/A                                                                                                                                                                            | N/A                                                                                                                                                                                                                                                                                                                                                                                            | N/A                                                                                                                         | N/A                        | N/A         |
| Stressors – abiotic, other |                                                                                                                                                                                | In danger of extinction principally as the result of urban development, conversion of native habitats to agriculture,                                                                                                                                                                                                                                                                          |                                                                                                                             | <i>Branchinecta lynchi</i> | [5]         |

|                                             |     |                                                                                                                 |                                                                                                                                    |                            |        |
|---------------------------------------------|-----|-----------------------------------------------------------------------------------------------------------------|------------------------------------------------------------------------------------------------------------------------------------|----------------------------|--------|
|                                             |     | and stochastic (random) extinction by virtue of the small isolated nature of many of the remaining populations. |                                                                                                                                    |                            |        |
| Existing management                         |     |                                                                                                                 | Listed as a vulnerable species on the IUCN Red List.<br>Listed under the U.S.A. Federal Endangered Species Act, September 19,1994. | <i>Branchinecta lynchi</i> | [5,49] |
| Indirect effects (obligatory relationships) | N/A | N/A                                                                                                             | N/A                                                                                                                                | N/A                        | N/A    |

<sup>a</sup>. “N/A” is used to indicate “Not Applicable”.

<sup>b</sup>. In Gallagher (1996), distribution and occurrence of *Branchinecta lynchi* in a large vernal-pool complex in Butte County, California, U.S.A., were sampled. The 105 ha vernal-pool complex was located northeast of the City of Chico, California (T 22 N, R 2 E, Sec 22), at an elevation of 60m [34].

<sup>c</sup>. A cell that is left blank reflects that no data was collected.
